# Supplementary material for: Molecular dissection of engraftment in a xenograft model of myelodysplastic syndromes
Source: PubMed Central journal article supplement (PMC5871091; doi:10.18632/oncotarget.24538), 2018-02-20
Supplement: oncotarget-09-14993-s001.pdf [file oncotarget-09-14993-s001.pdf]

## Molecular dissection of engraftment in a xenograft model of myelodysplastic syndromes

### SUPPLEMENTARY MATERIALS

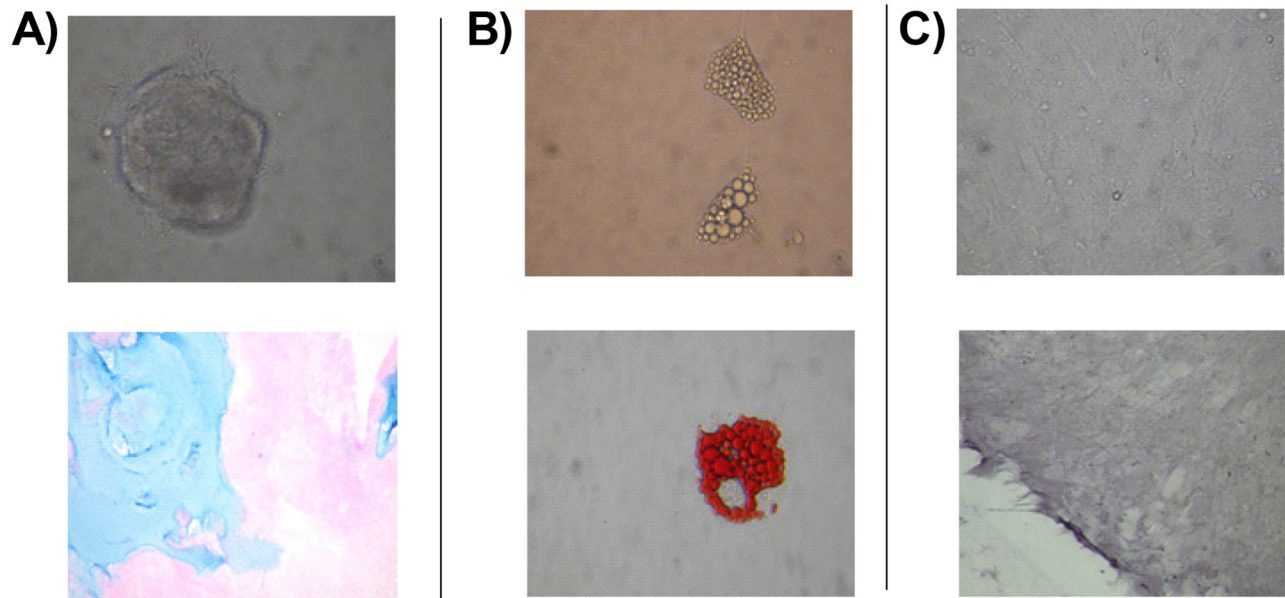

**Supplementary Figure 1: Results confirming the ability for trilineage differentiation of mesenchymal stromal cells (adipogenic, osteogenic and chondrogenic).** (A) Chondrocyte before and after alcian blue staining, X400. (B) Adipocyte before and after red oil staining, X400. (C) Osteocyte before and after alkaline phosphatase staining, X40. All the methods are described in the manuscript.
